# Supplementary material for: d-Penicillamine and bovine serum albumin co-stabilized copper nanoclusters with remarkably enhanced fluorescence intensity and photostability for ultrasensitive detection of Ag+
Source: Royal Society of Chemistry journal article supplement (doi:10.1039/c5nj02615f), 2015-11-16
Supplement: c5nj02615f1.pdf [file c5nj02615f1.pdf]

## Supplementary data

### D-penicillamine and bovine serum albumin co-stabilized copper nanoclusters with remarkably enhanced fluorescence intensity and photostability for ultrasensitive detection of Ag<sup>+</sup>

Li Ruiyi,<sup>a</sup> Wang Huiying,<sup>a</sup> Zhou Xiaoyan,<sup>a</sup> Liao Xiaoqing,<sup>a</sup> Sun Xiulan<sup>b</sup> and Li Zaijun<sup>\*,a,c</sup>

<sup>a</sup> School of Chemical and Material Engineering, Jiangnan University, Wuxi 214122, China

<sup>b</sup> School of Food Science and Technology, Jiangnan University, Wuxi 214122, China

<sup>c</sup> Key Laboratory of Food Colloids and Biotechnology, Ministry of Education, Wuxi 214122, China

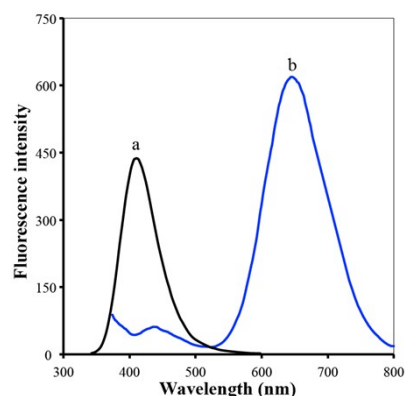

Fig.S1 The fluorescence spectra of BSA-CuNCs (a) and DPA-CuNCs (b)

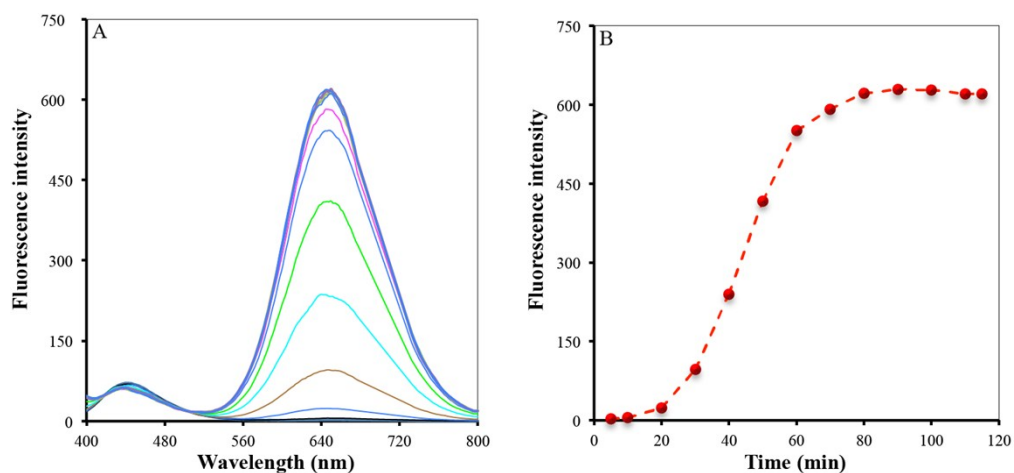

Fig.s2A: Fluorescence spectra of the Cu<sup>2+</sup>-DPA solution at 5, 10, 20, 30, 40, 50, 60, 70, 80, 90, 100, 110 and 115 minute (from bottom to top). B: The relationship curve of peak fluorescence intensity with reaction time

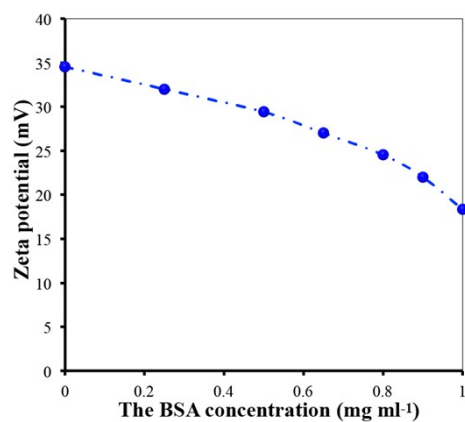

Fig.s3 The effect of BSA concentration on the zeta potential of BSA/DPA-CuNCs

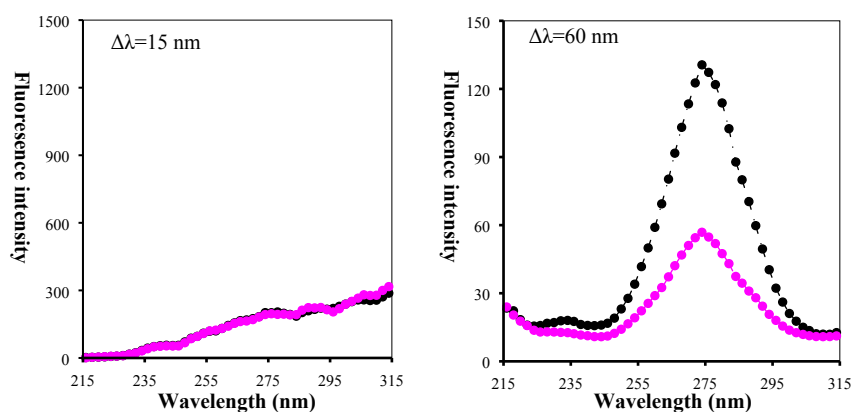

Fig.s4 Synchronous fluorescence spectra at (a)  $\Delta\lambda=15$  and (b)  $\Delta\lambda=60$  of BSA (0.02 mg ml<sup>-1</sup>) in the presence (up) and in the absence (down) of the BSA/DPA-CuNCs

Table s1 The secondary structures of BSA in the absence and presence of DPA-CuNCs

| The system                                  | The secondary structures of BSA (%) |                |               |           |
|---------------------------------------------|-------------------------------------|----------------|---------------|-----------|
|                                             | $\alpha$ -helix                     | $\beta$ -sheet | $\beta$ -turn | unordered |
| BSA (1.0 mg ml <sup>-1</sup> )              | 0.707                               | 0.218          | 0.011         | 0.094     |
| DPA-CuNCs + BSA (1.0 mg ml <sup>-1</sup> )  | 0.798                               | 0.008          | 0.067         | 0.162     |
| DPA-CuNCs + BSA (0.1 mg ml <sup>-1</sup> )  | 0.798                               | 0.04           | 0.057         | 0.160     |
| DPA-CuNCs + BSA (0.02 mg ml <sup>-1</sup> ) | 0.796                               | 0.01           | 0.067         | 0.164     |
